# Supplementary material for: A Paper-Based Electrochemical Sensor Based on PtNP/COFTFPB−DHzDS@rGO for Sensitive Detection of Furazolidone
Source: MDPI journal article supplement (doi:10.3390/bios12100904), 2022-10-21
Supplement: s1 [file s1]

---

## Supporting Information

# **A paper-based electrochemical sensor based on PtNPs/COF<sub>TFPB-DHzDS</sub>@rGO for sensitive determination of furazolidone**

Rongfang Chen, Xia Peng, Yonghai Song and Yan Du\*

National Engineering Research Center for Carbohydrate Synthesis/Key Lab of Fluorine, Silicon for Energy  
Materials and Chemistry of Ministry of Education, College of Chemistry and Chemical Engineering, Jiangxi  
Normal University, 99 Ziyang Avenue, Nanchang 330022, China.

---

\* Correspondence: Tel: +86 0791 88120861. E-mail: wjxdu01@jxnu.edu.cn (Y.D.) or wjxdu01@163.com.

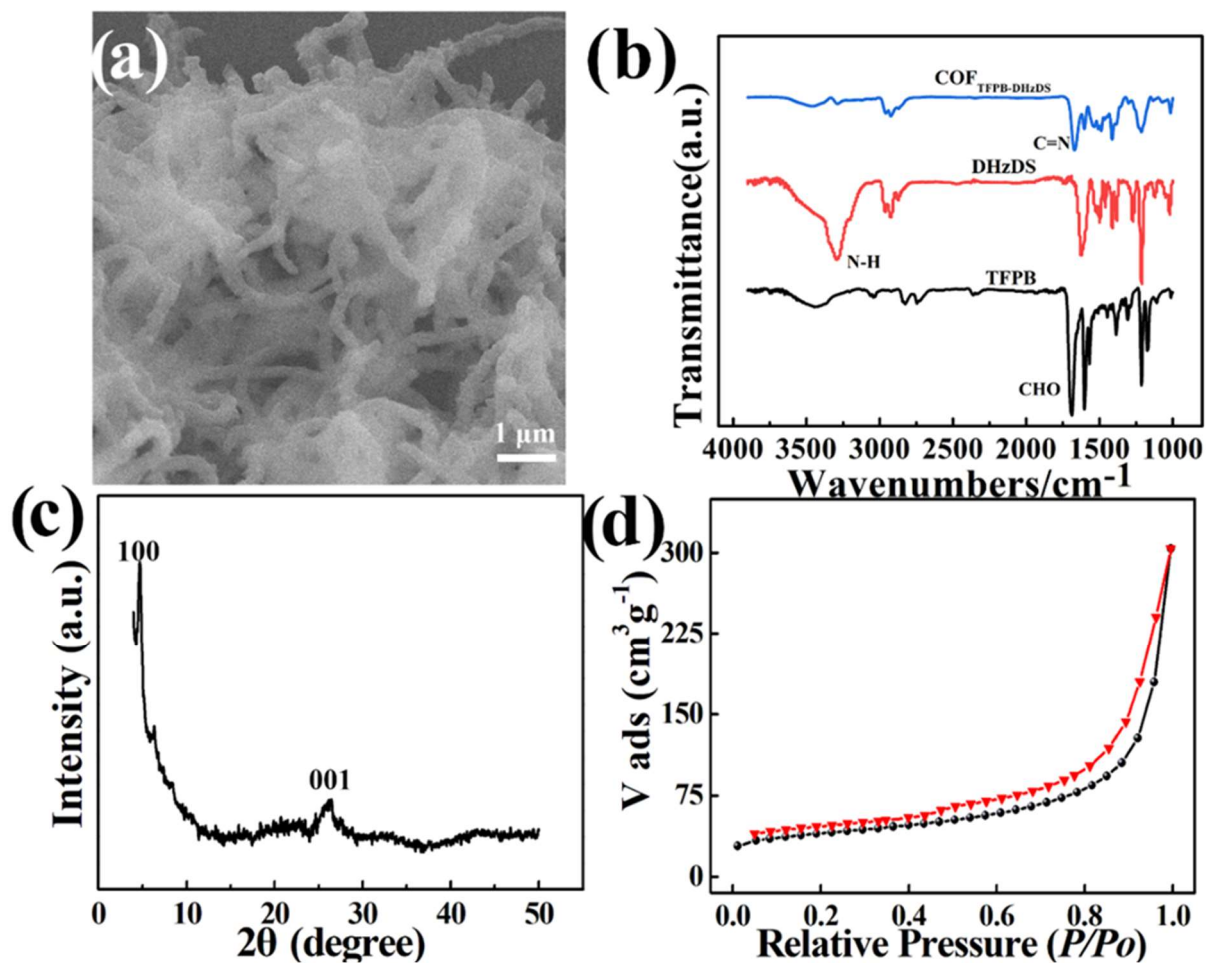

**Figure S1.** SEM image (a), FTIR spectrum (b), XRD pattern (c) and  $\text{N}_2$  adsorption/desorption isotherm (d) of  $\text{COF}_{\text{TFPB-DH}_2\text{DS}}$ .

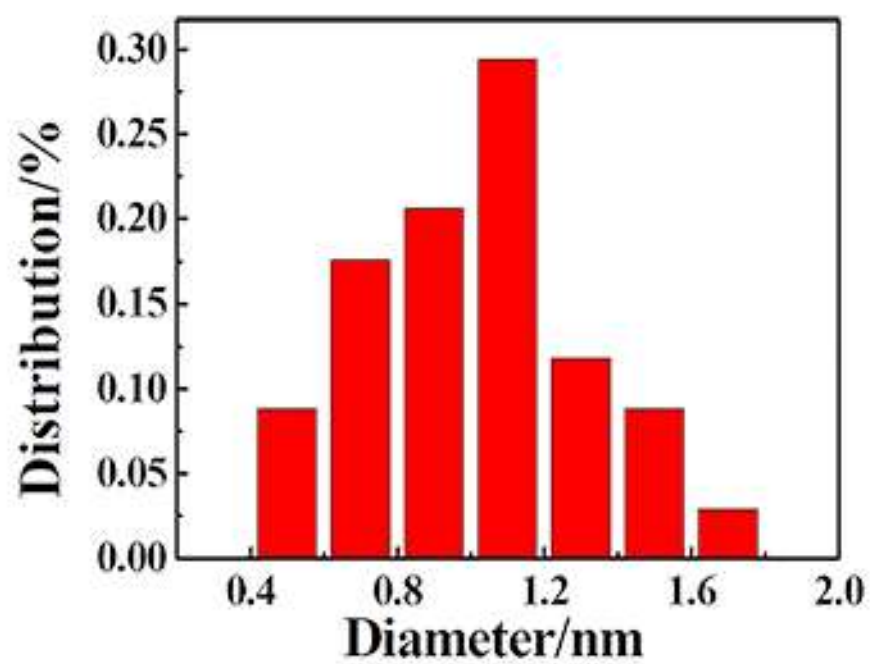

**Figure S2.** the particle size distribution of PtNPs in PtNPs/COF<sub>TFPB-DHzDS</sub>@rGO.

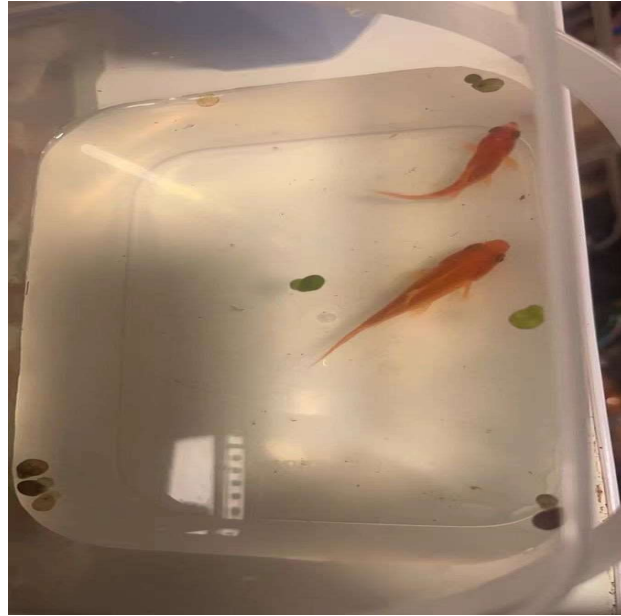

**Figure S3.** Picture of fish with furazolidone.

**Table S1.** The determination of furazolidone in human serum sample by PtNPs/COF<sub>TFPB-DHzDS</sub>@rGO/PBE.

| Added (μM) | Found (μM) | Recovery (%) | RSD (% , n = 3) |
|------------|------------|--------------|-----------------|
| 0          | -          | -            | -               |
| 20         | 19.5       | 97.5         | 2.5             |
| 40         | 40.2       | 100.5        | 0.5             |
| 60         | 59.6       | 99.3         | 0.6             |

**Table S2.** The determination of furazolidone in fish sample by PtNPs/COF<sub>TFPB-DHzDS</sub>@rGO/PBE.

| Added (μM) | Found (μM) | Recovery (%) | RSD (% , n = 3) |
|------------|------------|--------------|-----------------|
| 5          | 4.86       | 97.2         | 2.8             |
| 10         | 9.53       | 95.3         | 4.7             |
| 15         | 14.8       | 98.7         | 1.3             |
